# Supplementary material for: Potential diagnostic biomarkers for immunogenic cell death in elderly female patients with ischemic stroke: identification and analysis
Source: Springer Nature journal article supplement (doi:10.1038/s41598-024-65390-w), 2024-06-24

**A**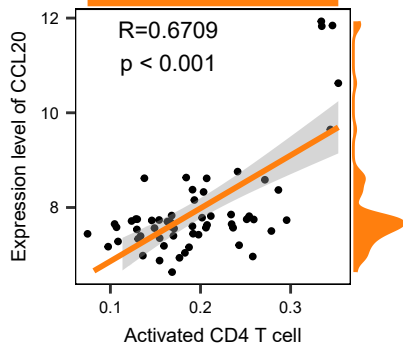**B**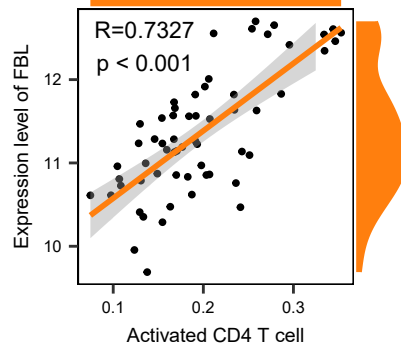**C**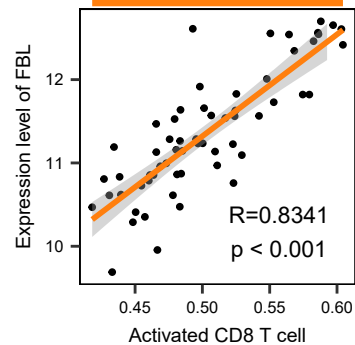**D**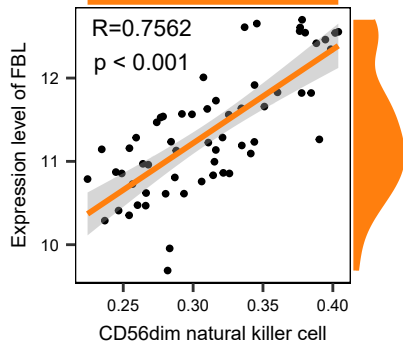**E**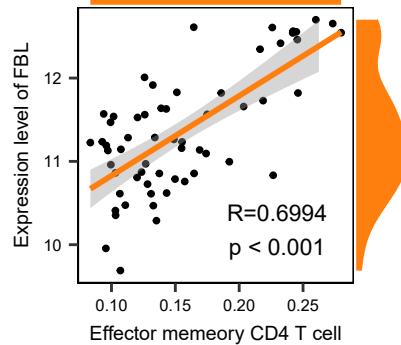**F**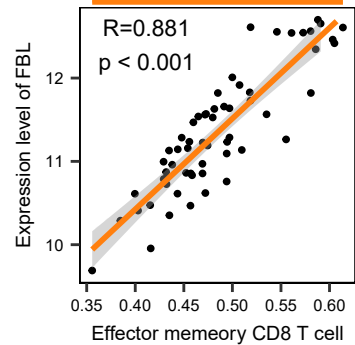**G**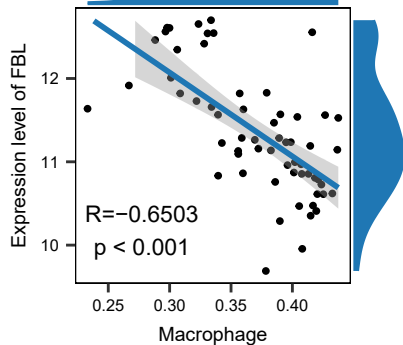**H**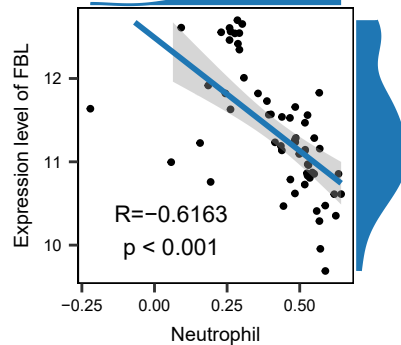**I**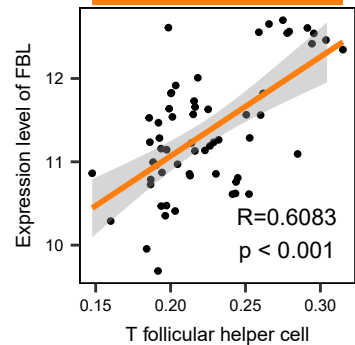

Supplement: MOESM2 [file 41598_2024_65390_MOESM2_ESM.pdf]
